# Supplementary material for: Phenylketonuria patients’ and their parents’ knowledge and attitudes to the daily diet - multi-centre study
Source: PubMed Central journal article supplement (PMC5559804; doi:10.1186/s12986-017-0207-1), 2017-08-17
Supplement: 12986_2017_207_MOESM1_ESM.pdf [file 12986_2017_207_MOESM1_ESM.pdf]

## Questionnaire for PKU patients

Name and surname:

|  |
|--|
|  |
|--|

Date of birth:

|  |
|--|
|  |
|--|

Place of residence:

|       |       |
|-------|-------|
| urban | rural |
|-------|-------|

Please state to what degree the following statements **relate to you** at this time

**Answer by placing X in the relevant box**

| 1. I can choose food products which I am allowed to eat unassisted.                      | Strongly disagree | Somewhat disagree | Neither agree nor disagree | Somewhat agree | Strongly agree |
|------------------------------------------------------------------------------------------|-------------------|-------------------|----------------------------|----------------|----------------|
| 2. Parents teach me self-reliance in meal preparation.                                   | Strongly disagree | Somewhat disagree | Neither agree nor disagree | Somewhat agree | Strongly agree |
| 3. I would prefer to decide more often what I can eat but my parents do not allow me to. | Strongly disagree | Somewhat disagree | Neither agree nor disagree | Somewhat agree | Strongly agree |
| 4. I feel helpless because of the constant need to follow the diet.                      | Strongly disagree | Somewhat disagree | Neither agree nor disagree | Somewhat agree | Strongly agree |
| 5. I am often ashamed of not being able to eat all foods.                                | Strongly disagree | Somewhat disagree | Neither agree nor disagree | Somewhat agree | Strongly agree |

6. State your daily requirement for:

|                    |  |             |  |
|--------------------|--|-------------|--|
| Phenylalanine (mg) |  | Protein (g) |  |
|--------------------|--|-------------|--|

7. How many milligrams of phenylalanine are in 100 grams of:

|        |  |                              |  |
|--------|--|------------------------------|--|
| apple  |  | potato                       |  |
| tomato |  | a slice of low protein bread |  |

8. How many times per day do you take formula:

|                   |  |                          |  |
|-------------------|--|--------------------------|--|
| 1-2 times per day |  | 3 and more times per day |  |
|-------------------|--|--------------------------|--|

9. State your blood phenylalanine levels within the last twelve months:

|        |  |         |  |
|--------|--|---------|--|
| lowest |  | highest |  |
|--------|--|---------|--|

Thank you for completing the questionnaire.
